# Supplementary material
Source: PubMed Central journal article supplement (PMC5899473)
Supplement: pnas.201721883SI.pdf [file pnas.201721883SI.pdf]

# Supporting Information

Smith-Moore et al. 10.1073/pnas.1721883115

## SI Methods

**Plasmids.** pcDNA-mycBirAR118G, pCMV-Rep40 (pND229), pCMV-Rep52 (pND230), pCMV-Rep68 Y156F M225G (pND226), and pCMV-Rep78 Y156F M225G (pND227) have been previously described (45). BirA\* and each of the Rep sequences were amplified by PCR, after which overlapping PCR was used to fuse the BirA\* fragment to the N terminus of each Rep fragment. The resulting amplicons were cloned into pcDNA3.1+. FLAG- and T7-tagged Rep proteins were generated by cloning Rep PCR products into either the pEGFP-C1 vector (Clontech) containing an N-terminal FLAG tag or a T7 tag, respectively. K372A mutants were generated by site-directed mutagenesis. ZNF truncation mutants were generated by PCR amplification of amino acids 1–529 ( $\Delta$ 91/87), 1–558 ( $\Delta$ 63), or 1–577 ( $\Delta$ 44), using either pND230 or pND227 as a template. The amplified fragments were then cloned into the N-terminal T7 vector described above. FLAG-PP1 $\alpha$  was generated by cloning PCR-amplified PP1 $\alpha$  from an EST clone (IRAUp969F0817D) obtained from Genome Cube into the N-terminal FLAG vector described above. pC1-FLAG-wtKAP1 was provided by H.M.R. and was used for cloning PCR-amplified wild-type KAP1 into untagged pcDNA3.1+. PP1 $\gamma$ -NIPP1 and NIPP1-WT, -RATA, -FHAm, -amino acids 1–142, -amino acids 143–224, -amino acids 225–251, -amino acids 1–224, and -amino acids 143–351 fused to eGFP were provided by M.B.

**Western Blot Analysis.** Cells were lysed in RIPA buffer, and proteins were separated on a 6–12% SDS/PAGE gel and transferred to a nitrocellulose membrane (Hybond-C Extra nitrocellulose; Amersham Biosciences). Membranes were blocked with either 5% nonfat dry milk or 2.5% BSA (for phospho-antibodies) in PBS containing 0.5% Tween-20 (PBST) for 45 min at room temperature and then were incubated with primary antibody for 2 h at room temperature. The membranes were then washed three times (10 min each washing) in PBST and were incubated with HRP-conjugated anti-mouse or anti-rabbit IgG (Bio-Rad) for 1 h at room temperature. After three 10-min washes in PBST, membranes were developed using West Pico ECL reagent (Thermo Scientific). The following primary antibodies were used: HSP90 (1:10,000; sc-69703; Santa Cruz), KAP1 (1:000; MAB3662; Chemicon), p-KAP1-S824 (1:2,000; A300-767A; Bethyl), VP (03-61058; 1:500; ARP), Rep (61069; 1:100; Progen), dsRed (632496; 1:2,000; Clontech), CHD3 (1:4,000; A301-219A; Bethyl), SETDB1 (1:1,000; ab12317; Abcam), FLAG (1:1,000; F1804; Sigma), T7 (69522-3; 1:10,000; Merck Millipore), pChk2 (1:1,000; 2661S; New England Biolabs), GFP (1:5,000; 11814460001; Roche), PP1 $\alpha$  (1:1,000; A300-904A; Cambridge Bioscience), PP1 $\beta$  (1:1,000; A300-905A; Cambridge Bioscience), PP1 $\gamma$  (1:1,000; sc-6108; Santa Cruz), and avidin peroxidase (1:8,000; Sigma).

**Lentiviral Transductions.** pC-SIREN-based lentiviral vectors expressing either a hairpin targeting the 3' UTR of KAP1 (shKAP1; GATCCGCCTGGCTCTGTTCTCTGTCCCTTCAAGAGAAGGA CAGAGAACAGAG CCAGGTTTTTACGCGTG) or the corresponding empty vector (shEMPTY) were provided by H.M.R. pCSIG-eGFP lentiviral vectors provided by S.J.D.N. were modified to contain the truncated CMV $\Delta$ 5 promoter (60) in place of the spleen focus-forming virus (SFFV) promoter and to express KAP1-WT, KAP1-S824D, or KAP1-S824A. Lentiviral vector-containing supernatants were produced by the common triple-transfection method using the VSV-G plasmid, HIV-Gag/Pol/Rev/Tat packaging plasmid, and the lentiviral transfer plasmid in a 3:2:1 molar ratio. Supernatants were harvested 48 and 72 h

after transfection, pooled, filtered, and frozen at  $-80^{\circ}\text{C}$  until use. For transduction,  $1 \times 10^6$  293T cells were transduced in a six-well format using 0.5–1.6 mL of particle-containing supernatant diluted with the appropriate amount of DMEM + 10% FBS. For complementation experiments, cells were transduced with pCSIG-based expression constructs and either shKAP1 or shEMPTY 72 h later. Cells were then infected with AAV and Ad5 48 h after knockdown.

**Immunofluorescence.** 293T cells were seeded at a density of  $2 \times 10^5/\text{mL}$  on poly-L-lysine (Sigma)-coated coverslips in 24-well plates the day before transfection. Four hours before transfection, DMSO or ATMi was added to the appropriate wells to a final concentration of 10  $\mu\text{M}$ . Cells were then transfected with 20 ng of empty vector or pRep78-GFP using 2  $\mu\text{L}$  Lipofectamine 2000 in 50  $\mu\text{L}$  SF Opti-MEM. The next day, cells were infected with Ad5 (2 pfu per cell) in a total volume of 160  $\mu\text{L}$  for 1 h, after which the medium was replaced with fresh DMEM + 10% FBS. Cells were fixed 24 h after Ad5 infection in 4% paraformaldehyde for 10 min at room temperature, washed in PBS, permeabilized in 0.1% Triton X-100 for 10 min at room temperature, and washed again in PBS. Cells were then incubated with primary antibody (1:1,000;  $\alpha$ -p-KAP1-S824 antibody) diluted in PBS + 1% BSA for 2 h at room temperature, washed, and then incubated with the secondary antibody, rabbit IgG2b-AlexaFluor 594 (1  $\mu\text{g}/\text{mL}$ ) (1:1,000; BioLegend) diluted in PBS for 1 h at room temperature. Cells were then washed a final time and mounted in Prolong Gold Antifade Reagent (Invitrogen). Images were visualized using an Eclipse Ti-E inverted confocal microscope and analyzed with NIS Elements C software.

**siRNA Transfections.** In a 24-well format,  $2 \times 10^5$  cells were transfected with 50 nM siKAP1.2 (GAAAUGUGAGCGUGU-ACUG) and siKAP1.4 (GAACGAGGCCUUCG GUGAC) or 100 nM siCHD3 (L-005046-00-0005; Dharmacon) and siSETDB1 (L-020070-00-0005; Dharmacon) siRNA using 2  $\mu\text{L}$  DharmaFECT (Dharmacon) in 50  $\mu\text{L}$  Opti-MEM (Gibco). Six hours later, the medium was replaced with fresh DMEM + 10% FBS. Twenty-four hours after transfection, cells were replated into a 12-well format. Thirty-six hours after transfection, cells were subjected to a second transfection as described above, using 4  $\mu\text{L}$  DharmaFECT in 100  $\mu\text{L}$  Opti-MEM. Four hours after the second transfection, cells were infected with AAV2 (10 IU per cell) and Ad5 (2 pfu per cell) as described for the viral replication experiments. For PP1 depletion experiments, cells were transfected only once with a total of 40 nM siPP1 $\alpha$  (L-008927-00-0005; Dharmacon), siPP1 $\beta$  (L-008685-00-0005; Dharmacon), or both as described above. Twenty-four hours after transfection, cells were replated into a 12-well format for infection the next day as described above.

**Real-Time PCR.** For analysis of viral replication, total DNA was extracted using the Qiagen DNeasy Blood and Tissue DNA extraction kit. Viral DNA was quantified by real-time PCR using the SYBR Green JumpStart Taq ReadyMix for qPCR (Sigma-Aldrich) using an ABI PRISM system (Applied Biosystems). Cap and Ad5 100kd-specific primers and a pDG-based (61) standard curve were used for absolute quantification; the signal was normalized to cyclophilin. The primers were Cap forward (5'-TTCTCAGATGCTGC GTACCGGAAA-3'), Cap reverse (5'-TCTGCCATTGAGGTGGTACTTGGT-3'); Ad5 100kd forward (5'-TCATTACCCAGGGCCACATT-3'), Ad5 100kd reverse (5'-CCTCGTCCAAAACCTCTCT-3'); and cyclophilin forward

(5'-GCTGGACCCAAC ACAAATG-3'), cyclophilin reverse (5'-TGCCATCCAACCACTCAGTCT-3').

**qRT-PCR.** Total RNA was extracted using the RNeasy kit (Qiagen) after DNaseI (Qiagen) treatment for 15 min at 37 °C. Reverse transcription was performed using the High Capacity Reverse Transcription kit (Applied Biosystems). cDNA was quantified by real-time qPCR on an ABI PRISM system (Applied Biosystems) using TaqMan Universal PCR Master Mix (Life Technologies) and custom-designed primer-probe mixes (Eurofins). Primers were p5 forward (5'-AACAAGGTGGTGGATGAGT-3'), p5 reverse (5'-CGTTTACGCTCCGTGAGATT-3') and p40 forward (5'-GAAGCAAGGCTCAGAGAAA-3') and p40 reverse (5'-CCTCTCTGGAGGTTGG TAGATA-3'). Probes were p5 (5'-FAM-ACGTGGTTGAGGTGGAGCATGAT-TAM-3') and p40 (5'-FAM-AGGAAATCAGGACAA CCAATCCCGT-TAM-

3'). Relative expression levels were determined with the  $\Delta\Delta C_t$  quantification method using 18S ribosomal RNA (Taqman pre-developed assay reagents, human 18S rRNA; Applied Biosystems) as a housekeeping reference gene.

**Analysis of p-KAP1-S824 Levels.** Phosphorylation of KAP1-S824 was investigated in 293T cells that were either infected with AAV2/Ad5 or transfected with various Rep-expressing constructs using linear PEI or NIPPI1-expressing constructs using TransIT-LT1 (Mirus). Where relevant, cells were pretreated with either DMSO or 10  $\mu$ M ATMi 4 h before infection/transfection, and inhibitors were maintained throughout. Infections were performed as described above, and transfections were performed at ~70% confluency using 1  $\mu$ g DNA per  $8 \times 10^5$  cells and 4  $\mu$ L PEI per microgram of DNA. The medium was changed 6 h after transfection, and cells were harvested for Western blot 27 h after infection/transfection.

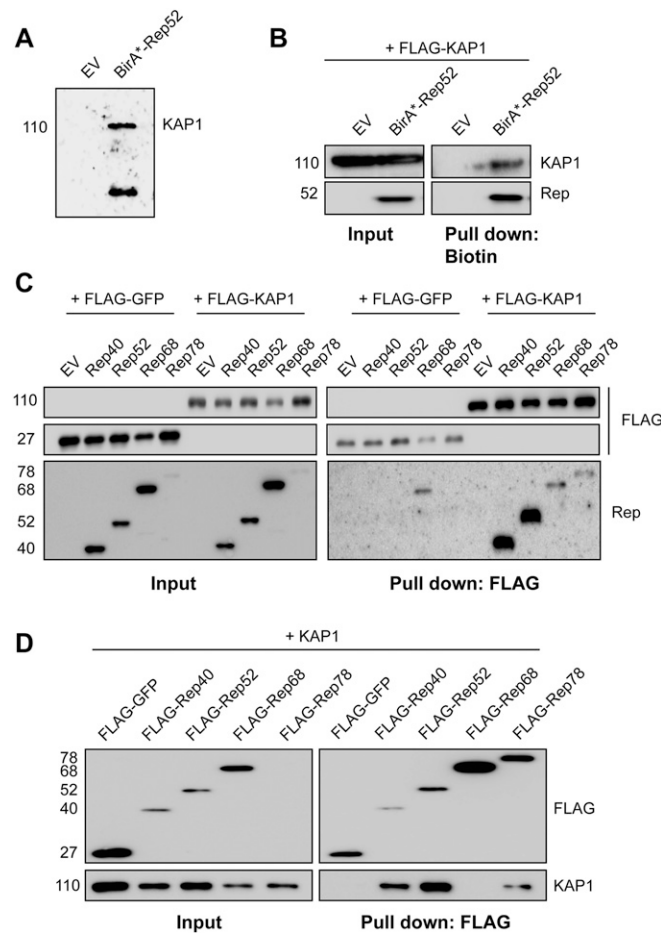

**Fig. 51.** The AAV2 Rep proteins physically interact with KAP1. (A) Immunoblot of biotinylated proteins purified from the BirA\*-Rep52 BioID screen using anti-KAP1. EV, empty vector. (B) Verification of BioID using exogenous FLAG-KAP1; purified biotinylated proteins from 293T cells expressing FLAG-KAP1 with either empty vector or BirA\*-Rep52 were analyzed for Rep and KAP1 by Western blot. (C) Cross-linked coimmunoprecipitation for FLAG-tagged proteins from 293T cells expressing FLAG-KAP1 or a FLAG-GFP control and each of the four Rep proteins. (D) Cross-linked coimmunoprecipitation for FLAG-tagged proteins from lysates of 293T cells expressing FLAG-GFP, FLAG-Rep40, FLAG-Rep52, FLAG-Rep68, or FLAG-Rep78 and KAP1.



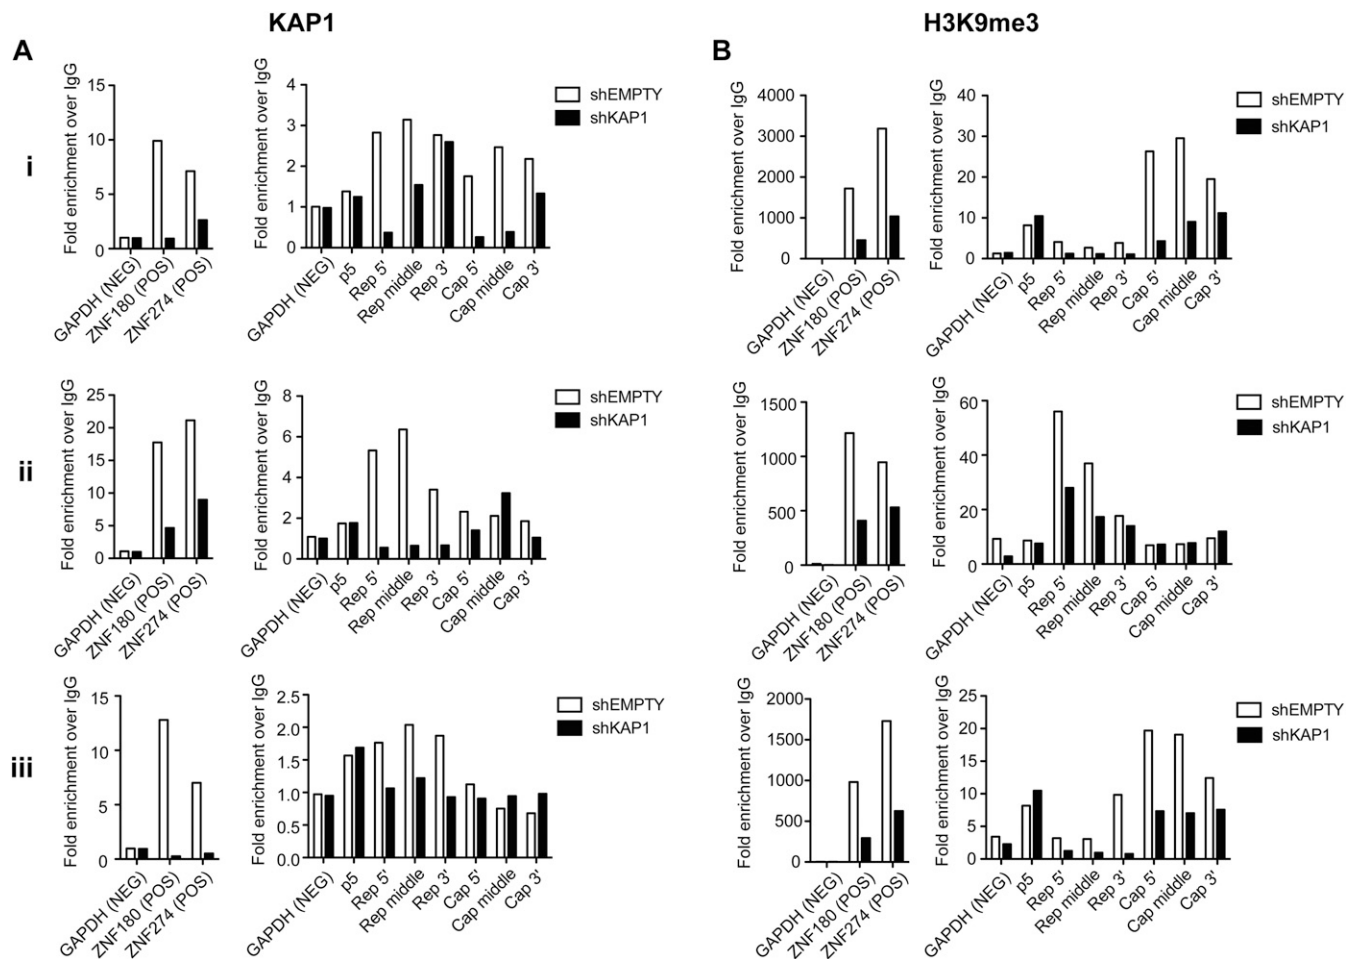

**Fig. S3.** ChIP-qPCR performed on control or KAP1-depleted 293T cells infected with AAV2 (100 IU per cell). Purified chromatin was analyzed by qPCR using primers for the viral p5 promoter or various regions of the *rep* and *cap* ORFs. *GAPDH* was used as a negative control, and the ZNF genes *ZNF180* and *ZNF274* were used as positive controls. Each of the three independent repeats (*i-iii*) is shown for (A) KAP1-specific and (B) H3K9me3-specific ChIP experiments (Fig. 1 D and E).











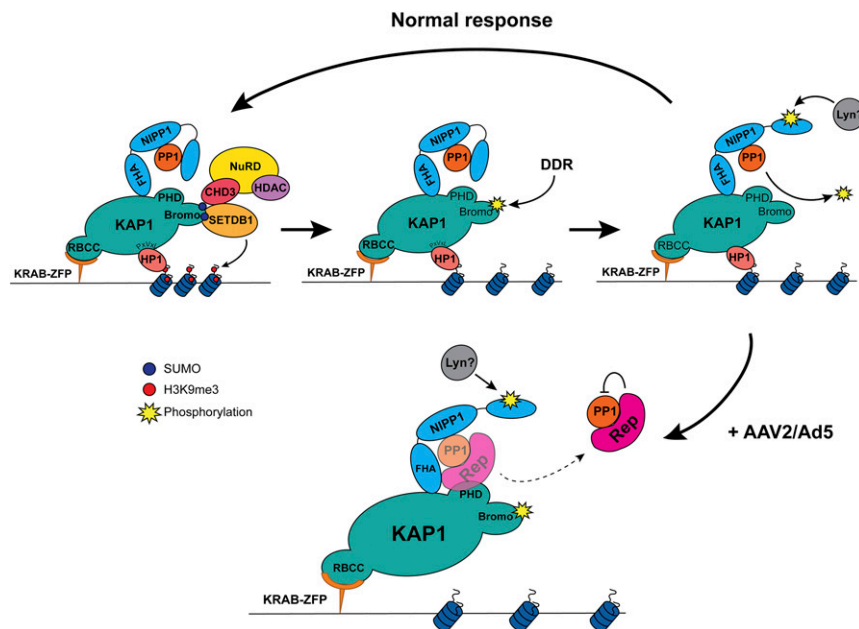

**Fig. S8.** Schematic representation of a model for the regulation of KAP1-S824 phosphorylation by NIPP1, PP1, and Rep. (Upper) Regulation in the absence of AAV2 infection. Inactive NIPP1-PP1 is recruited to KAP1 via the NIPP1 FHA domain. Initiation of a DDR leads to phosphorylation of KAP1-S824, allowing heterochromatin relaxation and repair. The DDR also leads to the inactivation of NIPP1 through phosphorylation of the C-terminal region, possibly through the tyrosine kinase Lyn, allowing PP1 to restore homeostatic levels of p-KAP1-S824. (Lower) In the event of AAV2/Ad5 coinfection, Rep interferes with this pathway by competing for PP1 and thus acts to maintain high levels of p-KAP1-S824 triggered by infection.

**Table S1. Peptides identified by BioID for KAP1 and various known interaction partners of the Rep proteins**

| Identified protein | Accession number | Bait protein | Unique peptides | Sequence coverage, % | Protein ID probability, % |
|--------------------|------------------|--------------|-----------------|----------------------|---------------------------|
| KAP1               | Q13263           | BirA*-Rep40  | 2               | 3.1                  | 100                       |
|                    |                  | BirA*-Rep52  | 8               | 12.9                 | 100                       |
|                    |                  | BirA*-Rep68  | 3               | 6.0                  | 100                       |
|                    |                  | BirA*-Rep78  | 1               | 1.3                  | 100                       |
| RUVBL1             | Q9Y265           | BirA*-Rep40  | 2               | 7.2                  | 100                       |
|                    |                  | BirA*-Rep52  | 7               | 22.1                 | 100                       |
|                    |                  | BirA*-Rep68  | 1               | 2.9                  | 99                        |
|                    |                  | BirA*-Rep78  | 1               | 2.9                  | 99                        |
| MRE11              | P49959           | BirA*-Rep40  | 1               | 2.0                  | 99                        |
|                    |                  | BirA*-Rep52  | 8               | 19                   | 100                       |
| SNW1               | Q5R7R9           | BirA*-Rep40  | 5               | 23.7                 | 100                       |
|                    |                  | BirA*-Rep52  | 9               | 24.1                 | 100                       |
|                    |                  | BirA*-Rep68  | 1               | 2.8                  | 100                       |
|                    |                  | BirA*-Rep78  | 2               | 4.3                  | 100                       |
| MDC1               | Q14676           | BirA*-Rep40  | 2               | 2.0                  | 100                       |
|                    |                  | BirA*-Rep52  | 4               | 3.3                  | 100                       |
|                    |                  | BirA*-Rep68  | 1               | 0.5                  | 100                       |
| TAF1/SET           | Q01105           | BirA*-Rep40  | 1               | 4.8                  | 100                       |
|                    |                  | BirA*-Rep68  | 1               | 4.8                  | 100                       |
| Nucleolin          | P19338           | BirA*-Rep40  | 1               | 2                    | 99                        |
|                    |                  | BirA*-Rep52  | 10              | 16.2                 | 100                       |
|                    |                  | BirA*-Rep68  | 13              | 18                   | 100                       |
|                    |                  | BirA*-Rep78  | 4               | 6.2                  | 100                       |
